# Supplementary material for: A novel method to encapsulate a Au nanorod array in 15 nm radius multiwalled carbon nanotubes
Source: Royal Society of Chemistry journal article supplement (doi:10.1039/c4nr04852k), 2014-01-01
Supplement: c4nr04852k1.pdf [file c4nr04852k1.pdf]

**Supporting information**

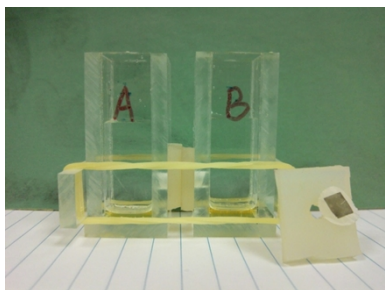

Figure S1 A photograph of the inter-diffusing cell and a nano-porous MWCNT membrane with Au-nanorods inside of CNTs.
